# Supplementary material for: The Association of Agent Orange (AO) Exposure with Monoclonal Gammopathy of Undetermined Significance (MGUS) to Multiple Myeloma (MM) Progression: A Population-based Study of Vietnam War Era Veterans
Source: Research Square preprint supplement (doi:10.21203/rs.3.rs-3396573/v1), 2023-10-09
Supplement: Supplementary file 1 [file 36c32677f372c3b4902cb018.docx]

Supplemental Table 1. List of MM-specific treatments:

| abecma |
| --- |
| belamaf |
| belantamab |
| belmaf |
| bendamustine |
| blenrep |
| bortezomib |
| carfilzomib |
| carvykti |
| cevostamab |
| ciltacabtagene |
| cilta-cel |
| cyclophosphamide |
| cytoxan |
| daratumumab |
| darzalex |
| elotuzumab |
| elranatamab |
| empliciti |
| evomela |
| farydak |
| idecabtagene |
| ide-cel |
| isatuximab |
| ixazomib |
| kyprolis |
| lenalidomide |
| melflufen |
| melphalan |
| ninlaro |
| panobinostat |
| pomalidomide |
| pomalyst |
| revlimid |
| sarclisa |
| selinexor |
| talquetamab |
| teclistamab |
| tecvayli |
| thalidomide |
| thalomid |
| velcade |
| venclexta |
| venetoclax |
| xpovio |
